# Supplementary material
Source: PubMed Central journal article supplement (PMC8785738)
Supplement: 6371_2_supp_57448_qlz4yq.pdf [file 6371_2_supp_57448_qlz4yq.pdf]

Supplemental Table 1. Panels (utilized in this study) and the genes included in each of them are summarized below.

|                                                                                    |                                                                                                                                                                                                                                                                                                                                                                                                                                                                                                              |
|------------------------------------------------------------------------------------|--------------------------------------------------------------------------------------------------------------------------------------------------------------------------------------------------------------------------------------------------------------------------------------------------------------------------------------------------------------------------------------------------------------------------------------------------------------------------------------------------------------|
| Nephrotic Syndrome (NS)/Focal Segmental Glomerulosclerosis (FSGS) Panel            | ACTN4, ANKFY1, ANLN, APOL1, ARHGAP24, ARHGDIA, CD2AP, CDK20, COL4A3, COL4A4, COL4A5, COL4A6, COQ2, COQ6, COQ8B, CRB2, CUBN, DGKE, DLC1, EMP2, FAT1, GAPVD1, GON7, INF2, ITGA3, ITGB4, ITSN1, ITSN2, KANK1, KANK2, KANK4, KAT2B, KIRREL1, LAGE3, LAMA5, LAMB2, LMX1B, MAFB, MAGI2, MYH9, MYO1E, NEU1, NFKB2, NPHS1, NPHS2, NUP107, NUP133, NUP160, NUP205, NUP93, OSGEP, PAX2, PDSS2, PLCE1, PTPRO, SCARB2, SGPL1, SMARCAL1, TBC1D8B, TNS2, TP53RK, TPRKB, TRIM8, TRPC6, TTC21B, WDR4, WDR73, WT1, XPO5, YRDC |
| Alport syndrome Panel                                                              | COL4A3, COL4A4, COL4A5, COL4A6                                                                                                                                                                                                                                                                                                                                                                                                                                                                               |
| Autosomal Dominant Polycystic Kidney Disease (ADPKD) panel                         | DNAJB11, GANAB, HNF1B, PKD1, PKD2                                                                                                                                                                                                                                                                                                                                                                                                                                                                            |
| Recessive Polycystic Kidney Disease (ARPKD) panel                                  | DZIP1L, PKHD1                                                                                                                                                                                                                                                                                                                                                                                                                                                                                                |
| Hereditary cystic kidney disease panel                                             | ANKS6, CEP164, CEP290, CEP83, COL4A1, CRB2, DCDC2, DICER1, DNAJB11, DZIP1L, GANAB, GLIS2, HNF1B, IFT172, INVS, IQCB1, JAG1, LRP5, MAPKBP1, MUC1, NEK8, NOTCH2, NPHP1, NPHP3, NPHP4, OFD1, PAX2, PKD1, PKD2, PKHD1, RPGRIP1L, SDCCAG8, SEC61A1, TMEM67, TSC1, TSC2, TTC21B, UMOD, VHL, WDR19, ZNF423                                                                                                                                                                                                          |
| Nephrotic Syndrome                                                                 | NPHS1, NPHS2, WT1, PLCE1, LAMB2                                                                                                                                                                                                                                                                                                                                                                                                                                                                              |
| Autosomal Dominant and Recessive Polycystic Kidney Disease (ADPKD and ARPKD) Panel | DNAJB11, DZIP1L, GANAB, HNF1B, PKD1, PKD2, PKHD1                                                                                                                                                                                                                                                                                                                                                                                                                                                             |
| Distal Renal Tubular Acidosis Panel                                                | ATP6V0A4, ATP6V1B1, CA2, SLC4A1                                                                                                                                                                                                                                                                                                                                                                                                                                                                              |
| Atypical Hemolytic Uremic syndrome (s-HUS) panel                                   | C3, CFB, CFH, CFHR1, CFHR3, CFHR5, CFI, DGKE, MCP, THBD                                                                                                                                                                                                                                                                                                                                                                                                                                                      |

|                                                                              |                                                                                                                                                                                                                                                                                                                                                                                                                                                                                                                                                                                                                                                                                                                                                                                                                                                                                                                                                                                                                                                                                                                                                                                                   |
|------------------------------------------------------------------------------|---------------------------------------------------------------------------------------------------------------------------------------------------------------------------------------------------------------------------------------------------------------------------------------------------------------------------------------------------------------------------------------------------------------------------------------------------------------------------------------------------------------------------------------------------------------------------------------------------------------------------------------------------------------------------------------------------------------------------------------------------------------------------------------------------------------------------------------------------------------------------------------------------------------------------------------------------------------------------------------------------------------------------------------------------------------------------------------------------------------------------------------------------------------------------------------------------|
| Tuberous Sclerosis Complex Panel                                             | TSC1, TSC2                                                                                                                                                                                                                                                                                                                                                                                                                                                                                                                                                                                                                                                                                                                                                                                                                                                                                                                                                                                                                                                                                                                                                                                        |
| Microscopic Hematuria (custom panel)                                         | ACTN4, ADCY10, APOL1, C1QA, C1QB, C1QC, C3, CASR, CD2AP, CFH, CFI, CLCN5, CLDN14, CLDN16, CLDN19, COL4A3, COL4A4, COL4A5, COL4A6, CYP24A1, FN1, INF2, MUC1, MYH9, MYO1E, NPHS2, OCRL, SEC61A1, SLC34A1, SPRY2, VHL                                                                                                                                                                                                                                                                                                                                                                                                                                                                                                                                                                                                                                                                                                                                                                                                                                                                                                                                                                                |
| Neurohypophyseal Diabetes Insipidus and Nephrogenic Diabetes Insipidus Panel | AQP2, AVP, AVPR2                                                                                                                                                                                                                                                                                                                                                                                                                                                                                                                                                                                                                                                                                                                                                                                                                                                                                                                                                                                                                                                                                                                                                                                  |
| Custom Glycosuria panel                                                      | SLC5A2, SLC5A2                                                                                                                                                                                                                                                                                                                                                                                                                                                                                                                                                                                                                                                                                                                                                                                                                                                                                                                                                                                                                                                                                                                                                                                    |
| Nephrolithiasis and Nephrocalcinosis Panel                                   | ADCY10, AGXT, APRT, ATP6V0A4, ATP6V1B1, CA2, CASR, CLCN5, CLDN16, CLDN19, CYP24A1, FAM20A, GRHPR, HNF4A, HOGA1, HPRT1, KCNJ1, OCRL, SLC12A1, SLC22A12, SLC26A1, SLC2A9, SLC34A1, SLC34A3, SLC3A1, SLC4A1, SLC7A9, SLC9A3R1, VDR, XDH                                                                                                                                                                                                                                                                                                                                                                                                                                                                                                                                                                                                                                                                                                                                                                                                                                                                                                                                                              |
| Nephrolithiasis Panel                                                        | ADCY10, AGXT, ALPL, APRT, ATP6V0A4, ATP6V1B1, CA2, CASR, CLCN5, CLDN16, CLDN19, CYP24A1, FAM20A, GPHN, GRHPR, HOGA1, HPRT1, KCNJ1, MOCOS, MOCS1, OCRL, PREPL, SLC12A1, SLC22A12, SLC26A1, SLC2A9, SLC34A1, SLC34A3, SLC4A1, SLC7A9, SLC9A3R1, UMOD, VDR, XDH                                                                                                                                                                                                                                                                                                                                                                                                                                                                                                                                                                                                                                                                                                                                                                                                                                                                                                                                      |
| Alagille syndrome                                                            | <u>ABCB11</u> , <u>ABCB4</u> , <u>ABCC2</u> , <u>ABCG5</u> , <u>ABCG8</u> , <u>ACOX2</u> , <u>AKR1C4</u> , <u>AKR1D1</u> , <u>ALDOB</u> , <u>AMACR</u> , <u>ATP8B1</u> , <u>BAAT</u> , <u>CC2D2A</u> , <u>CFTR</u> , <u>CLDN1</u> , <u>CYP27A1</u> , <u>CYP7A1</u> , <u>CYP7B1</u> , <u>DCDC2</u> , <u>DGUOK</u> , <u>DHCR7</u> , <u>EHHADH</u> , <u>FAH</u> , <u>GNAS</u> , <u>GPBAR1</u> , <u>HNF1B</u> , <u>HSD17B4</u> , <u>HSD3B7</u> , <u>INVS</u> , <u>JAG1</u> , <u>KMT2D</u> , <u>LIPA</u> , <u>MKS1</u> , <u>MPV17</u> , <u>MYO5B</u> , <u>NOTCH2</u> , <u>NPC1</u> , <u>NPC2</u> , <u>NPHP1</u> , <u>NPHP3</u> , <u>NPHP4</u> , <u>NR1H4</u> , <u>PEX1</u> , <u>PEX10</u> , <u>PEX11B</u> , <u>PEX12</u> , <u>PEX13</u> , <u>PEX14</u> , <u>PEX16</u> , <u>PEX19</u> , <u>PEX2</u> , <u>PEX26</u> , <u>PEX3</u> , <u>PEX5</u> , <u>PEX6</u> , <u>PEX7</u> , <u>PKD1L1</u> , <u>PKHD1</u> , <u>POLG</u> , <u>SCP2</u> , <u>SERPINA1</u> , <u>SLC10A1</u> , <u>SLC10A2</u> , <u>SLC25A13</u> , <u>SLC27A5</u> , <u>SLC51A</u> , <u>SLC51B</u> , <u>SMPD1</u> , <u>TALDO1</u> , <u>TJP2</u> , <u>TMEM216</u> , <u>TRMU</u> , <u>UGT1A1</u> , <u>UTP4</u> , <u>VIPAS39</u> , <u>VPS33B</u> |
| Bartter syndrome panel                                                       | BSND, CASR, CLCNKA, CLCNKB, GNAI1, KCNJ1, MAGED2, SLC12A1, SLC12A3                                                                                                                                                                                                                                                                                                                                                                                                                                                                                                                                                                                                                                                                                                                                                                                                                                                                                                                                                                                                                                                                                                                                |
| Wilms tumor                                                                  | WT1                                                                                                                                                                                                                                                                                                                                                                                                                                                                                                                                                                                                                                                                                                                                                                                                                                                                                                                                                                                                                                                                                                                                                                                               |
| Periodic Paralysis Panel                                                     | CACNA1S, KCNJ1, RYR1, SCN4A                                                                                                                                                                                                                                                                                                                                                                                                                                                                                                                                                                                                                                                                                                                                                                                                                                                                                                                                                                                                                                                                                                                                                                       |

Total blue print panel : [https://www.bcm.edu/research/medical-genetics-labs/test\\_detail.cfm?testcode=1390](https://www.bcm.edu/research/medical-genetics-labs/test_detail.cfm?testcode=1390)

**Supplemental Table 2. "Other" indications for referral are summarized in this table**

| <b>Name of disease</b>           | <b>Number</b> |
|----------------------------------|---------------|
| Hypertension                     | 2             |
| CKD                              | 2             |
| Rhabdomyolysis                   | 2             |
| Diamond-Blackfan anemia          | 1             |
| Nephronophthisis                 | 3             |
| Bilateral Wilms Tumor            | 1             |
| Renal Tubular Acidosis           | 1             |
| Bartter syndrome                 | 2             |
| Diabetes insipidus               | 2             |
| Hypokalemic paralysis            | 1             |
| Glycosuria                       | 1             |
| Hyperuricemia and nephropathy    | 1             |
| Townes brock syndrome            | 1             |
| Nephrocalcinosis                 | 5             |
| Macrocephaly and low muscle tone | 1             |
| Alagille syndrome                | 1             |
| Gitelman syndrome                | 1             |
| a-HUS                            | 3             |
| Micropenis                       | 1             |
| Mitochondrial                    | 1             |
| Bilateral renal angiomyolipoma   | 1             |
| Hypophosphatemia                 | 1             |
| VACTERL                          | 1             |
| Hyperoxaluria                    | 1             |
| Hypomagnesemia                   | 2             |
| Hypocalcemia                     | 1             |
| Autism and renal artery stenosis | 1             |
| Joubert                          | 2             |
|                                  | 43            |

**Supplemental Table 3. Detection rates of different tests among indications for referral**

**Cystic Kidney disease total of 49**

|                 | <b>Total number</b>                                                                                                                                         | <b>Positive</b> | <b>VUS</b> | <b>Negative</b> |
|-----------------|-------------------------------------------------------------------------------------------------------------------------------------------------------------|-----------------|------------|-----------------|
| <b>Panel</b>    | 19                                                                                                                                                          | 15              | 2          | 2               |
| <b>CMA</b>      | 3                                                                                                                                                           | 0               | 0          | 3               |
| <b>CMA/ES</b>   | 13                                                                                                                                                          | 4               | 7          | 2               |
| <b>ES</b>       | 3                                                                                                                                                           | 3               | 0          | 0               |
| <b>Not done</b> | 11 (3 asymptomatic patients with family history of ADPKD, 4 insurance denial, 1 patient not available, 3 patients not interested to pursue genetic testing) |                 |            |                 |

**CAKUT total of 41**

|                        | <b>Total Number</b>                      | <b>Positive</b> | <b>VUS</b> | <b>Negative</b> |
|------------------------|------------------------------------------|-----------------|------------|-----------------|
| <b>Panel</b>           | 0                                        | 0               | 0          | 0               |
| <b>CMA</b>             | 9                                        | 5               | 0          | 4               |
| <b>CMA/ES</b>          | 22                                       | 8*              | 12         | 2               |
| <b>ES</b>              | 1                                        | 1               | 0          | 0               |
| <b>Total Blueprint</b> | 1                                        | 0               | 1          | 0               |
| <b>Not done</b>        | 8 (7 not interested, 1 insurance denial) |                 |            |                 |

\*includes three partially diagnosed cases

**Hematuria Total number of 38**

|                             | <b>Total number</b>                                                | <b>Positive</b> | <b>VUS</b> | <b>Negative</b> |
|-----------------------------|--------------------------------------------------------------------|-----------------|------------|-----------------|
| <b>Panel</b>                | 15                                                                 | 10              | 4          | 1               |
| <b>CMA</b>                  | 2                                                                  | 0               | 1          | 1               |
| <b>Panel and ES</b>         | 1                                                                  | 1               | 0          | 0               |
| <b>CMA/ES</b>               | 12                                                                 | 7               | 2          | 3               |
| <b>Panel and CMA and ES</b> | 1                                                                  | 1               | 0          | 0               |
| <b>ES</b>                   | 1                                                                  | 1               | 0          | 0               |
| <b>Not done</b>             | 6 (3 not interested to pursue genetic testing, 3 insurance denial) |                 |            |                 |

**Proteinuria total number of 21**

|                                                | <b>Total number</b>                                      | <b>Positive</b> | <b>VUS</b> | <b>Negative</b> |
|------------------------------------------------|----------------------------------------------------------|-----------------|------------|-----------------|
| <b>Panel</b>                                   | 10                                                       | 7               | 2          | 1               |
| <b>CMA</b>                                     | 0                                                        | 0               | 0          | 0               |
| <b>Panel and CMA</b>                           | 1                                                        | 0               | 1          | 0               |
| <b>CMA/ES</b>                                  | 8                                                        | 5               | 2          | 1               |
| <b>CMA and Panel and Total Blueprint panel</b> | 1                                                        | 0               | 1          | 0               |
| <b>Not done</b>                                | 1 (patient was not interested to pursue genetic testing) |                 |            |                 |

**Other indications total number of 43**

|                                          | <b>Total number</b>                                                | <b>Positive</b> | <b>VUS</b> | <b>Negative</b> |
|------------------------------------------|--------------------------------------------------------------------|-----------------|------------|-----------------|
| <b>Panel</b>                             | 11                                                                 | 5               | 3          | 3               |
| <b>CMA</b>                               | 4                                                                  | 2               | 0          | 2               |
| <b>CMA/ES</b>                            | 14                                                                 | 8               | 6          | 0               |
| <b>Panel and CMA, and ES</b>             | 1                                                                  | 0               | 1          | 0               |
| <b>Total BluePrint</b>                   | 3                                                                  | 1               | 1          | 1               |
| <b>CMA and Total Blueprint</b>           | 1                                                                  | 1               | 0          | 0               |
| <b>Panel and CMA and Total Blueprint</b> | 1                                                                  | 1               | 0          | 0               |
| <b>Not done</b>                          | 8 (4 not interested to pursue genetic testing, 4 due to insurance) |                 |            |                 |

**Supplemental Table 4. Impact on management in patients with partial diagnosis**

| Patient Number | L1 | L2 | L3 | L4 | L5 | Type of genetic testing (1,2,3,4,5) | Partial diagnosis  | Gene/locus    | SNV                                                         | Phenotype                                       |
|----------------|----|----|----|----|----|-------------------------------------|--------------------|---------------|-------------------------------------------------------------|-------------------------------------------------|
| RGC-0022       | -  | -  | +  | -  | +  | 2,4                                 | Hearing Loss       | <i>GJB2</i>   | NM_004004.5; c.35delG, (p.G12VfsX2) and c.416G>A, (p.S139N) | Proteinuria, PUV, bilateral hearing loss        |
| RGC-0023       | -  | -  | +  | -  | +  | 2,4                                 | Cataract           | <i>CHMP4B</i> | NM_176812.4; c.508_510delGAA, (p.E170del) (Het)             | Cataract and proteinuria                        |
| RGC-0036       | -  | -  | +  | -  | +  | 2,4                                 | Sickle cell anemia | <i>HBB</i>    | NM_000518.4; c.20A>T, (p.E7V)( Hom)                         | Sickle cell anemia and proteinuria              |
| RGC-0106       | -  | -  | -  | +  | +  | 2,4                                 | DD                 | <i>NAA15</i>  | NM_057175.3; c.439C>T (p.Q147X) (Het)                       | Syndromic CAKUT                                 |
| RGC-0133       | -  | -  | +  | -  | +  | 2,4                                 | DD                 | <i>CHMP1A</i> | NM_002768.4; c.88 C>T (p.Q30X) (Hom)                        | Hyperoxaluria, DD, non-verbal, wheelchair bound |

L1, impact on medical or surgical treatment; L2, change of medical diagnosis; 3, providing diagnostic certainty; 4, subsequent evaluation for other body system involvement; 5, cascade family member testing; CNV, copy number variant; DD, developmental delay; PUV, posterior urethral valve; SNV, single nucleotide variant. Type of testing; 1, panel; 2, CMA; 3, proband ES; 4, trio ES; 5, Total blueprint panel.

Supplement Table 5. Demographics, phenotype, genetic variants' information, clinician's comments and recommendations for patients without diagnostic result who were found to have variants of uncertain significance (VUS)

| Patient ID | Gender | Age | Phenotype     | Testing (1,2,3,4,5) | Gene         | Variant                                                          | gnomAD   | CADD score | Clinician's comment                                                                                                               | Recommendation                         |
|------------|--------|-----|---------------|---------------------|--------------|------------------------------------------------------------------|----------|------------|-----------------------------------------------------------------------------------------------------------------------------------|----------------------------------------|
| RGC-0007   | M      | 4   | Cystic kidney | 3                   | <i>PKD1</i>  | NM_001009944; c.971G>T,(p.R324L)(Het) (inherited from father)    | 0        | 13.07      |                                                                                                                                   | Paternal kidney US recommended         |
| RGC-0007   | M      | 4   | Cystic kidney | 3                   | <i>TRPC6</i> | NM_004621; c.2116G>A, p.V706I (Het) (inherited from mother)      | 2/250230 | 28         | Recessive disorder and only one heterozygous variant                                                                              |                                        |
| RGC-0007   | M      | 4   | Cystic kidney | 3                   | <i>LAMB2</i> | NM_002292; c.5233G>A, (p.A1745T)(Het) (inherited from mother)    | 0        | 24.5       | Recessive disorder and only one heterozygous variant                                                                              |                                        |
| RGC-0007   | M      | 4   | Cystic kidney | 3                   | <i>MYO1E</i> | NM_004998; c.1615C>A, (p.L539M)(Het) (inherited from father)     | 0        | 16.21      | Recessive disorder and only one heterozygous variant                                                                              |                                        |
| RGC-0007   | M      | 4   | Cystic kidney | 3                   | <i>ITGA8</i> | NM_003638; c.1492A>G (p.M498V)(Het)(inherited from mother)       | 1/251076 | 0.876      | Inherited from the affected mother but variant predicted benign and phenotype does not match with dysplastic kidney in the mother |                                        |
| RGC-0011   | M      | 2   | Cystic kidney | 3                   | <i>PKD1</i>  | NM_001009944; c.8119G>A (p.V2707M) (Het) (inherited from father) | 0        | 9.007      |                                                                                                                                   | Paternal kidney US recommended         |
| RGC-0011   | M      | 2   | Cystic kidney | 3                   | <i>PKD1</i>  | NM_001009944; c.4151C>T (p.T1384I) (Het) (inherited from father) | 0        | 24.5       |                                                                                                                                   | Paternal kidney ultrasound recommended |
| RGC-0011   | M      | 2   | Cystic kidney | 3                   | <i>PKD1</i>  | NM_001009944; c.3239C>A (p.P1080H) (Het) (inherited from mother) | 2/214486 | 23.5       |                                                                                                                                   | Maternal kidney US recommended         |

|          |   |      |              |   |                                 |                                                                      |            |       |                                                                                                                                                                                                                                                                                                                            |                                                                           |
|----------|---|------|--------------|---|---------------------------------|----------------------------------------------------------------------|------------|-------|----------------------------------------------------------------------------------------------------------------------------------------------------------------------------------------------------------------------------------------------------------------------------------------------------------------------------|---------------------------------------------------------------------------|
| RGC-0012 | F | 16.8 | Hematuria    | 2 | <i>TRPC6</i><br>and <i>YAP1</i> | arr(hg19) 11q22.1<br>(101,450,649-<br>102,064,511)x3                 | NA         | NA    | <i>TRPC6</i> might be<br>disrupted therefore<br>this VUS might<br>have clinical<br>consequences<br>(clinical<br>significance of a<br>duplication of these<br>or any genes in this<br>region is not<br>currently known.<br>This region in its<br>entirety is not<br>known to vary in<br>copy number in<br>normal population | Annual UA and<br>follow up with<br>nephrology                             |
| RGC-0016 | M | 17.1 | Kidney stone | 3 | <i>TRPC6</i>                    | NM_004621; c.1678G>A<br>(p.A560T) (Het) (inherited<br>from mother)   | 0          | 17.98 | VUS inherited from<br>unaffected mother                                                                                                                                                                                                                                                                                    | Follow up in 2<br>years for reanalysis<br>of tES                          |
| RGC-0016 | M | 17.1 | Kidney stone | 3 | <i>SLC4A4</i>                   | NM_001098484;<br>c.149G>C<br>(p.G50A)(Het)(inherited<br>from mother) | 390/249120 | 20.6  | Recessive disorder<br>and only one<br>heterozygous<br>variant                                                                                                                                                                                                                                                              |                                                                           |
| RGC-0025 | M | 18   | Proteinuria  | 3 | <i>COL4A5</i>                   | NM_033380.1;<br>c.2180C>G (p.P727R)<br>(inherited from mother)       | 0          | 27.3  | Phenotype does<br>not match Alport<br>and mother does<br>not have<br>microscopic<br>hematuria                                                                                                                                                                                                                              | Follow up<br>recommended                                                  |
| RGC-0027 | F | 16   | CAKUT        | 3 | <i>IL17RD</i>                   | NM_017563.3 ;c.8C>G<br>(p.P3R) (Het)(inherited<br>from father)       | 0          | 26.1  | Phenotype does<br>not fit with<br>Kallmann<br>syndrome but VUS<br>could contribute to<br>kidney anomaly                                                                                                                                                                                                                    | Testing of family<br>members/paternal<br>kidney ultrasound<br>recommended |
| RGC-0040 | F | 3.4  | CAKUT        | 3 | <i>CHD7</i>                     | NM_017780; c.8378C>G<br>(p.A2793G)(Het)(inherited<br>from father)    | 4/244694   | 24    | Phenotype does<br>not fit                                                                                                                                                                                                                                                                                                  |                                                                           |
| RGC-0040 | F | 3.4  | CAKUT        | 3 | <i>PKD2</i>                     | NM_000297; c.2420G>A<br>(p.R807Q)(Het)(inherited<br>from father)     | 754/251136 | 26.1  | Phenotype does<br>not fit                                                                                                                                                                                                                                                                                                  |                                                                           |
| RGC-0040 | F | 3.4  | CAKUT        | 3 | <i>PKD1</i>                     | NM_001009944;<br>c.6749C>T                                           | 0          | 23.5  | Phenotype does<br>not fit                                                                                                                                                                                                                                                                                                  |                                                                           |



|          |   |     |       |   |               |                                                                  |            |       |                                                                |                                                                         |
|----------|---|-----|-------|---|---------------|------------------------------------------------------------------|------------|-------|----------------------------------------------------------------|-------------------------------------------------------------------------|
|          |   |     |       |   |               | (p.T2250M)(Het)(inherited from mother)                           |            |       |                                                                |                                                                         |
| RGC-0040 | F | 3.4 | CAKUT | 3 | <i>MSR1</i>   | arr 8p22(16032346-16073395)x1                                    | NA         | NA    | Likely benign                                                  |                                                                         |
| RGC-0040 | F | 3.4 | CAKUT | 3 | <i>MSR1</i>   | arr 8p22(15965430-16021863)x3                                    | NA         | NA    | Likely benign, Inherited from mother                           |                                                                         |
| RGC-0048 | F | 9.8 | CAKUT | 3 | <i>LRP2</i>   | NM_004525; c.2456G>A (p.R819H)(Het)(inherited from father)       | 27/251146  | 25.1  | Patient does not have full phenotype of Donnai-Barrow Syndrome | Brain MRI was normal, urine beta 2 microglubin is high, RBP recommended |
| RGC-0048 | F | 9.8 | CAKUT | 3 | <i>LRP2</i>   | NM_004525; c.403G>A (p.D135N)(Het)(inherited from mother)        | 0          | 24    |                                                                |                                                                         |
| RGC-0048 | F | 9.8 | CAKUT | 3 | <i>PKD1</i>   | NM_001009944; c.10325C>T (p.A3442V)(Het) (inherited from father) | 1/244174   | 12.83 | Phenotype does not fit                                         | Paternal kidney US recommended                                          |
| RGC-0048 | F | 9.8 | CAKUT | 3 | <i>PKD1</i>   | NM_001009944; c.5530G>C (p.G1844R)(Het)(inherited from father),  | 0          | 21.3  | Phenotype does not fit                                         | Paternal kidney US recommended                                          |
| RGC-0048 | F | 9.8 | CAKUT | 3 | <i>SLC7A9</i> | NM_014270; c.814G>A (p.V272M) (Het) (inherited from father)      | 0          | 13.93 | Recessive disorder and only one heterozygous variant           |                                                                         |
| RGC-0048 | F | 9.8 | CAKUT | 3 | <i>FRAS1</i>  | NM_025074; c.6584A>G (p.E2195G)(Het)(inherited from father)      | 238/280120 | 22.4  | Two <i>FRAS1</i> variants on the same chromosome               |                                                                         |
| RGC-0048 | F | 9.8 | CAKUT | 3 | <i>FRAS1</i>  | NM_025074;c.9553G>A (p.G3185R)(Het)(inherited from father)       | 197/279136 | 24.8  |                                                                |                                                                         |
| RGC-0048 | F | 9.8 | CAKUT | 3 | <i>NPHP1</i>  | NM_000272; c.830G>A (p.R277Q)(Het) (inherited from mother)       | 173/282608 | 2.723 | Recessive disorder and only one heterozygous variant           |                                                                         |
| RGC-0059 | F | 12  | CAKUT | 3 | <i>CC2D2A</i> | NM_001080522; c.2597A>G, (p.N866S)(Het)( inherited from mother)  | 45/280162  | 16.74 | Recessive disorder and only one heterozygous variant           |                                                                         |

|          |   |     |                                           |     |                |                                                                    |            |       |                                                        |                                   |
|----------|---|-----|-------------------------------------------|-----|----------------|--------------------------------------------------------------------|------------|-------|--------------------------------------------------------|-----------------------------------|
| RGC-0059 | F | 12  | CAKUT                                     | 3   | <i>PKHD1</i>   | NM_138694; c. 5750A>G, (p. Q1917R)(Het)(inherited from father)     | 0          | 32    | Recessive disorder and only one heterozygous variant   |                                   |
| RGC-0059 | F | 12  | CAKUT                                     | 3   | <i>ITGA8</i>   | NM_003638; c. 1336G>A, (p.V446I)(Het)(inherited from mother)       | 126/282842 | 2.758 | Recessive disorder and only one heterozygous variant   |                                   |
| RGC-0064 | M | 12  | CAKUT                                     | 3   | <i>NID1</i>    | NM_002508.2; c.3680dupC (p.G1228RfsX9)(Het)(inherited from father) | 0          | 6.445 | VUS seems likely pathogenic, affected sibling positive | Brain MRI, testing siblings       |
| RGC-0064 | M | 12  | CAKUT                                     | 3   | <i>NID1</i>    | NM_002508.2; c.1297C>T (p.R433X)(Het)(inherited from mother)       | 0          | 12.17 | VUS seems likely pathogenic, affected sibling positive | Brain MRI, testing siblings       |
| RGC-0065 | F | 1   | Other (Nephromegaly and Nephrocalcinosis) | 3   | <i>CRB2</i>    | NM_173689.5; c.1298C>T (p.P433L)(Het)                              | 124/282294 | 15.97 | Recessive disorder and only one heterozygous variant   |                                   |
| RGC-0065 | F | 1   | Other (Nephromegaly and Nephrocalcinosis) | 3   | <i>LIG4</i>    | NM_002312.3; c.686A>G (p.H229R)(Het)                               | 178/281618 | 23.3  | Recessive disorder and only one heterozygous variant   |                                   |
| RGC-0065 | F | 1   | Other(Nephromegaly and Nephrocalcinosis)  | 3   | <i>PSAT1</i>   | NM_058179.2; c.94T>C (p.Y32H)(Het)                                 | 5/280748   | 25.2  | Recessive disorder and only one heterozygous variant   |                                   |
| RGC-0065 | F | 1   | Other(Nephromegaly and Nephrocalcinosis)  | 3   | <i>COL4A5</i>  | NM_000495.4; c.4450T>C (p.Y1484H)(Het)                             | 0          | 25.4  | Unrelated to patient's phenotype                       |                                   |
| RGC-0065 | F | 1   | Other(Nephromegaly and Nephrocalcinosis)  | 3   | <i>SH3YL1</i>  | Arr 2p25.3 (66097-239712)x1                                        | NA         | NA    | Non disease-associated regions                         | No parental follow-up recommended |
| RGC-0065 | F | 1   | Other(Nephromegaly and Nephrocalcinosis)  | 3   | <i>NUP62CL</i> | Arr Xp22.3 (106384817-106398144)x1                                 | NA         | NA    | Non disease-associated regions                         | No parental follow-up recommended |
| RGC-0069 | M | 2.3 | Proteinuria                               | 1,2 | <i>CD2AP</i>   | NM_012120.2; c. 1286_1288dup (p.E429dup)(Het)                      | 126/250158 | 3.562 | In-frame duplication                                   | tES recommended                   |
| RGC-0094 | F | 3.5 | CAKUT                                     | 3   | <i>COL4A5</i>  | NM_000495.4; c.2600T>C (p.I867T)(Het)                              | 2/182030   | 16.49 | Unrelated to patient's phenotype                       | Reanalysis of ES                  |

|          |   |      |               |   |                                                                                                            |                                                                                                           |            |       |                                                                        |                                   |
|----------|---|------|---------------|---|------------------------------------------------------------------------------------------------------------|-----------------------------------------------------------------------------------------------------------|------------|-------|------------------------------------------------------------------------|-----------------------------------|
| RGC-0095 | M | 9    | Cystic kidney | 1 | <i>PKD1</i>                                                                                                | NM001009944.2;<br>c.8498C>A (p.P2833H)<br>(Het)                                                           | 0          | 6.179 | Conserved codon,<br>seems likely<br>pathogenic                         | Testing affected<br>mother        |
| RGC-0096 | M | 10.7 | Cystic Kidney | 3 | <i>PKD1</i>                                                                                                | NM_001009944.2;<br>c.10810 G>A (p.E3604K)<br>(Het)(inherited from<br>father)                              | 0          | 22.9  | Seems likely<br>pathogenic based<br>on PKDB and<br>Clinvar             | Paternal kidney US<br>recommended |
| RGC-0096 | M | 10.7 | Cystic Kidney | 3 | Portion of<br><i>PLEKHA7</i> ,<br><i>ABCC8</i> and<br>6 other<br>genes                                     | arr[GRCh37]<br>11p15.1(16957123_17439<br>236)x3(inherited from<br>father)                                 | NA         | NA    |                                                                        |                                   |
| RGC-0096 | M | 10.7 | Cystic Kidney | 3 | Portion of<br><i>VCX3A</i> ,<br>entire<br><i>HDHD1</i> ,<br><i>STS</i> , <i>VCX</i> ,<br>and <i>PNPLA4</i> | arr[GRCh37]<br>Xp22.31(6453036_81318<br>10)x2<br>(inherited from mother)                                  | NA         | NA    | Patient affected by<br>Arthrogryposis and<br><i>VCX3A</i> is disrupted | Testing of siblings               |
| RGC-0099 | M | 1.5  | CAKUT         | 3 |                                                                                                            | arr[GRCh37]<br>(X)x1~2,(Y)x1 (Mosaic<br>gain)(155186Kb)<br>associated with mosaic<br>Klinefelter syndrome | NA         | NA    | 20-30% mosaicism                                                       | Follow up                         |
| RGC-0103 | M | 0.01 | CAKUT         | 3 | <i>FAT1</i>                                                                                                | NM_005245.3; c.7014C>A<br>(p.S2338R)(Het)(inherited<br>from mother)                                       | 7/280606   | 4.937 |                                                                        | Follow up                         |
| RGC-0103 | M | 0.01 | CAKUT         | 3 | <i>FAT1</i>                                                                                                | NM_005245.3; c.9320G>T<br>(p.C3107F)(Het)(inherited<br>from mother)                                       | 5/249052   | 24.9  |                                                                        |                                   |
| RGC-0103 | M | 0.01 | CAKUT         | 3 | <i>PPEF1</i>                                                                                               | arr [GRCh19] Xp22.13<br>(18821936-18822035)x0                                                             | NA         | NA    | No disease<br>association                                              |                                   |
| RGC-0104 | F | 14.8 | Proteinuria   | 3 | <i>MYO1E</i>                                                                                               | NM_004998.3;<br>c.2627C>G<br>(p.T876R)(Het)(inherited<br>from mother)                                     | 400/282482 | 20.8  | Recessive disorder<br>and only one<br>heterozygous<br>variant          |                                   |
| RGC-0104 | F | 14.8 | Proteinuria   | 3 | <i>PLCE1</i>                                                                                               | NM_016341.3;<br>c.2032A>G<br>(p.M678V)(Het)(inherited<br>from father)                                     | 280/280870 | 23.6  | Recessive disorder<br>and only one<br>heterozygous<br>variant          |                                   |
| RGC-0107 | F | 5.3  | CAKUT         | 3 | <i>BICC1</i>                                                                                               | NM_001080512.2;<br>c.707A>G                                                                               | 8/282402   | 3.304 | Strong evidence at<br>gene level                                       | Paternal kidney US<br>recommended |

|          |   |      |                                       |     |               |                                                                |             |       |                                                                                    |                        |
|----------|---|------|---------------------------------------|-----|---------------|----------------------------------------------------------------|-------------|-------|------------------------------------------------------------------------------------|------------------------|
|          |   |      |                                       |     |               | (p.N236S)(Het)(inherited from father)                          |             |       |                                                                                    |                        |
| RGC-0109 | M | 15.6 | Other (Hyperuricemic and nephropathy) | 5   | <i>WT1</i>    | NM_024426.4; c.358G>A (p.G120S )(Het)                          | 0           | 22.4  | No phenotype overlap                                                               |                        |
| RGC-0109 | M | 15.6 | Other                                 | 5   | <i>WDR19</i>  | NM_025132.3; c.*7C>T (Het)                                     | 54/275970   | 0.436 | Recessive disorder and only one heterozygous variant                               |                        |
| RGC-0109 | M | 15.6 | Other                                 | 5   | <i>PKHD1</i>  | NM_138694.3; c.2744C>T (p.A915V)(Het)                          | 0           | 26.3  | No phenotype overlap (kidneys not enlarged)                                        |                        |
| RGC-0109 | M | 15.6 | Other                                 | 5   | <i>PKHD1</i>  | NM_138694.3; c.7675G>C (p.V2559L) (Het)(inherited from mother) | 280/282300  | 9.628 | Predicted benign                                                                   |                        |
| RGC-0111 | F | 0.01 | CAKUT                                 | 3   | <i>COL4A4</i> | NM_000092.4; c.3394C>G (p.P1132A)(Het)( inherited from father) | 1/248216    | 25.4  | No phenotype overlap                                                               |                        |
| RGC-0111 | F | 0.01 | CAKUT                                 | 3   | <i>LAMB2</i>  | NM_002292.3; c.4224+19G>C(Het) (inherited from father)         | 3031/279460 | 4.844 | Recessive disorder and only one heterozygous variant                               |                        |
| RGC-0122 | M | 4    | Hematuria                             | 3   | <i>COL4A3</i> | NM_000091.4; c.1483C>T (p.H495Y)(Het)(inherited from father)   | 202/280910  | 0.689 | Kidney biopsy showed TBM                                                           | Testing other siblings |
| RGC-0122 | M | 4    | Hematuria                             | 3   | <i>FN1</i>    | NM_212482.1; c.3626C>T (p.T1209I)(Het)(inherited from mother)  | 2/251442    | 24.4  | Biopsy does not fit                                                                |                        |
| RGC-0125 | F | 14   | Other(a-HUS)                          | 1,3 | <i>THBD</i>   | NM_000361; c.1456G>T (p.D486Y)(Het)                            | 2115/276574 | 1.136 |                                                                                    | Reanalyze ES           |
| RGC-0125 | F | 14   | Other(a-HUS)                          | 1,3 | <i>DGKE</i>   | NM_003647; c.303G>C (p.K101N)(Het)                             | 39/282288   | 22.9  | Recessive disorder and only one heterozygous variant                               |                        |
| RGC-0125 | F | 14   | Other(a-HUS)                          | 1,3 | <i>GANAB</i>  | NM_198335.2; c.1652A>C (p.N551T)(Het)(inherited from father)   | 0           | 22.3  | No family history on paternal side, and positive family history from maternal side |                        |

|          |   |    |               |       |                |                                                                 |             |       |                                                                                                                                  |                                          |
|----------|---|----|---------------|-------|----------------|-----------------------------------------------------------------|-------------|-------|----------------------------------------------------------------------------------------------------------------------------------|------------------------------------------|
| RGC-0125 | F | 14 | Other(a-HUS)  | 1,3   | <i>ALMS1</i>   | NM_015120.4; c.9463A>T (p.T3155S)(Het)(inherited from father)   | 65/249098   | 24.7  | Recessive disorder and only one heterozygous variant                                                                             |                                          |
| RGC-0125 | F | 14 | Other(a-HUS)  | 1,3   | <i>TRIOBP</i>  | NM_0010391412; c.6632A>T (p.Q2211L)(Het)(inherited from father) | 40/280310   | 28.2  | Recessive disorder and only one heterozygous variant                                                                             |                                          |
| RGC-0125 | F | 14 | Other(a-HUS)  | 1,3   | <i>GRHPR</i>   | NM_012203.1; c.374G>A (p.R125Q)(Het)(inherited from father)     | 78/282832   | 29.7  | Recessive disorder and only one heterozygous variant                                                                             |                                          |
| RGC-0125 | F | 14 | Other(a-HUS)  | 1,3   | <i>DGKE</i>    | NM_003647.2; c.303G>C (p.K101N)(Het)(inherited from father)     | 39/282288   | 23.2  | Recessive disorder and only one heterozygous variant                                                                             |                                          |
| RGC-0126 | M | 17 | Proteinuria   | 1,2,5 | <i>CFH</i>     | NM_000186.3; c.2270A>C (p.N757T)(Het)                           | 0           | 0.112 | No phenotype overlap                                                                                                             |                                          |
| RGC-0126 | M | 17 | Proteinuria   | 1,2,5 | <i>CD2AP</i>   | NM_012120.2; c.164A>C (p.K55T)(Het)                             | 63/282798   | 30    | Fits with biopsy report and family history                                                                                       |                                          |
| RGC-0126 | M | 17 | Proteinuria   | 1,2,5 | <i>NPHS2</i>   | NM_014625; c.725C>T (p.A242V)(Het)                              | 1962/281850 | 25.3  | Recessive disorder and only one heterozygous variant                                                                             |                                          |
| RGC-0126 | M | 17 | Proteinuria   | 1,2,5 | <i>LAMB2</i>   | NM_004646; c.2740G>A (p.G914A)(Het)                             | 0           | 27.7  | Although patient has two variants in <i>LAMB2</i> , Family history of proteinuria in this patient suggest AD mode of inheritance | Parental testing for KFM in <i>LAMB2</i> |
| RGC-0126 | M | 17 | Proteinuria   | 1,2,5 | <i>LAMB2</i>   | NM_004646; c.1193C>T (p.T398I)(Het)                             | 694/282716  | 7.968 |                                                                                                                                  | Parental testing for KFM in <i>LAMB2</i> |
| RGC-0130 | M | 20 | Cystic kidney | 3     | <i>SEC61A1</i> | NM_013336.3; c.554 C>G (p.T185S)(Het)(de novo)                  | 0           | 28.4  | Patient's phenotype has overlap with reported phenotype associate with this gene                                                 |                                          |
| RGC-0136 | F | 7  | CAKUT         | 3     | <i>MT-RNR2</i> | m.2872C>T(Homoplasmic)(inherited from mother)                   | 0           | NA    | Mother also homoplasmic suggesting that this                                                                                     |                                          |

|          |   |    |               |   |                 |                                                                   |           |       |                                                                                                                  |                                                         |
|----------|---|----|---------------|---|-----------------|-------------------------------------------------------------------|-----------|-------|------------------------------------------------------------------------------------------------------------------|---------------------------------------------------------|
|          |   |    |               |   |                 |                                                                   |           |       | variant is more likely to be benign                                                                              |                                                         |
| RGC-0138 | F | 16 | CAKUT         | 5 | <i>GJB3</i>     | NM_024009.2; c.223C>T (p.R75C)(Het)(inherited from mother),       | 42/282762 | 29.7  | Mother does not have hearing loss                                                                                |                                                         |
| RGC-0138 | F | 16 | CAKUT         | 5 | <i>WFS1</i>     | NM_006005.3; c.527T>C (p.V176A)(Het)(inherited from mother)       | 3/250700  | 22.4  | Mother does not have hearing loss                                                                                |                                                         |
| RGC-0138 | F | 16 | CAKUT         | 5 | <i>GATA3</i>    | NM_0010022951; c.826C>T (p.R276W)(Het)                            | 0         | 32    | Patient's phenotype has overlap with reported phenotype associate with this gene, patient has hypoparathyroidism | KFM testing of other family members                     |
| RGC-0138 | F | 16 | CAKUT         | 5 | <i>NPHS1</i>    | NM_004646.3; c.7C>A (p.L3M)(Het)                                  | 8/185830  | 4.560 | Recessive disorder and only one heterozygous variant                                                             |                                                         |
| RGC-0139 | M | 15 | Cystic kidney | 3 | <i>PRKD1</i>    | NM_002742.2; c.1947T>G (p.F649L)(Het)(inherited from mother)      | 2/250352  | 11.83 | Mother reported to have heart disease                                                                            |                                                         |
| RGC-0139 | M | 15 | Cystic kidney | 3 | <i>PKD1</i>     | NM_001009944.2 ; c.7061A>C (p.Q2354P)(Het)(inherited from father) | 0         | 27.1  | Likely the cause of ADPKD, there is history of ADPKD in father                                                   | Testing of siblings for specific variant in <i>PKD1</i> |
| RGC-0139 | M | 15 | Cystic kidney | 3 | <i>PKD1</i>     | NM_001009944.2 ; c.6097G>A (p.A2033T)(Het)(inherited from father) | 11/275498 | 23.2  | there is history of ADPKD in father                                                                              | Testing of siblings for specific variant in <i>PKD1</i> |
| RGC-0140 | F | 8  | CAKUT         | 3 | <i>KIAA1109</i> | NM_015312.3; c.822-3T>C (Het)(inherited from father)              | 2/247734  | 6.412 | Recessive disorder and only one heterozygous variant                                                             |                                                         |
| RGC-0140 | F | 8  | CAKUT         | 3 | <i>COL4A4</i>   | NM_000092.4 ; c.2985C>T (p.P995=)(Het)(inherited from father)     | 19/280864 | 0.112 |                                                                                                                  |                                                         |
| RGC-0140 | F | 8  | CAKUT         | 3 | <i>FANCC</i>    | NM_000136.2; c.998T>C (p.L333P)(Het)(inherited from father)       | 2/249760  | 22.4  | Recessive disorder and only one heterozygous variant                                                             |                                                         |

|          |   |     |                      |     |                |                                                               |            |       |                                                      |                            |
|----------|---|-----|----------------------|-----|----------------|---------------------------------------------------------------|------------|-------|------------------------------------------------------|----------------------------|
| RGC-0140 | F | 8   | CAKUT                | 3   | <i>AHI1</i>    | NM_017651.4; c.1621G>T (p.D541Y)(Het)(inherited from mother)  | 0          | 24.2  | Recessive disorder and only one heterozygous variant |                            |
| RGC-0140 | F | 8   | CAKUT                | 3   | <i>TMTC3</i>   | NM_181783.3; c.10A>G (p.I4V)(Het)(inherited from father)      | 13/276640  | 12.90 | Recessive disorder and only one heterozygous variant |                            |
| RGC-0140 | F | 8   | CAKUT                | 3   | <i>CFH</i>     | NM_000186.3; c.506A>G (p.H169R)(Het)(inherited from father)   | 3/251074   | 0.014 | No phenotype overlap                                 |                            |
| RGC-0141 | F | 0.9 | Other (Hypocalcemia) | 3   | <i>TRPC6</i>   | NM_004621.5; c.101T>C (p.M34T) (Het)(inherited from father)   | 2/199782   | 24.5  | Father does not have kidney disease                  |                            |
| RGC-0141 | F | 0.9 | Other (Hypocalcemia) | 3   | <i>SLC12A1</i> | NM_000338.2; c.2282G>A (p.R761Q)(Het)(inherited from mother)  | 26/282292  | 22.7  | Recessive disorder and only one heterozygous variant |                            |
| RGC-0141 | F | 0.9 | Other (Hypocalcemia) | 3   | <i>INVS</i>    | NM_014425.3; c.2822A>G (p.H941R)(Het)(inherited from mother)  | 1/251378   | 6.868 | Recessive disorder and only one heterozygous variant |                            |
| RGC-0141 | F | 0.9 | Other (Hypocalcemia) | 3   | <i>ITGA8</i>   | NM_003638.1; c.1156T>C (p.F386L)(Het)(inherited from mother)  | 14/282834  | 22.4  | Recessive disorder and only one heterozygous variant |                            |
| RGC-0141 | F | 0.9 | Other (Hypocalcemia) | 3   | <i>APOL1</i>   | NM_003661.3; c.334C>T (p.R112C)(Het)(de novo)                 | 4/251190   | 11.68 | Variant discussed with experts and seems benign      |                            |
| RGC-0142 | F | 0.5 | Other (a-HUS)        | 1,4 | <i>CFH</i>     | NM_000186.3; c.3357C>G (p.D1119E)(Het)(inherited from mother) | 3/282870   | 11.94 | Patient has homozygous <i>CFHR3-CFHR1</i> deletion   | Follow up                  |
| RGC-0142 | F | 0.5 | Other (a-HUS)        | 1,4 | <i>ITGA8</i>   | NM_003638.2; c.840T>C(p.S280=)(Het)(inherited from father)    | 215/282194 | 7.427 | Recessive disorder and only one heterozygous variant |                            |
| RGC-0148 | F | 2   | Hematuria            | 1   | <i>ACTN4</i>   | NM_004924.5; c.751C>T (p.R251W)(Het)(inherited from father)   | 3/143328   | 32    |                                                      | Paternal kidney evaluation |

|          |   |     |                    |   |               |                                                              |            |       |                                                                                  |                                 |
|----------|---|-----|--------------------|---|---------------|--------------------------------------------------------------|------------|-------|----------------------------------------------------------------------------------|---------------------------------|
| RGC-0149 | M | 3   | Hematuria          | 1 | <i>COL4A4</i> | NM_000092.4; c.1442G>T (p.G481V)(Het)(inherited from mother) | 1/143110   | 26    | Segregation study suggests this variant causes hematuria in this family          |                                 |
| RGC-0150 | M | 1.6 | Other (DI)         | 1 | <i>AVPR2</i>  | NM_000054.4; c.910+5G>T (intronic)(Hem)                      | 0          | 9.197 | Segregation study suggests this variant causes DI in this family                 |                                 |
| RGC-0153 | F | 9   | Other (Glycosuria) | 1 | <i>SLC5A2</i> | NM_00304.3; c.1665+4A>T (Het)(inherited from father)         | 0.003%     | 19.57 |                                                                                  | Determine father's phenotype    |
| RGC-0158 | M | 8   | Hematuria          | 1 | <i>COL4A3</i> | NM_000091.4; c.4445C>T (p.A1482V)(Het)                       | 223/143266 | 22.5  | May describe phenotype                                                           |                                 |
| RGC-0158 | M | 8   | Hematuria          | 1 | <i>NPHS1</i>  | NM_004646.3; c.2614G>A (p.V872I)(Het)                        | 3/143174   | 18.54 | Pt also has nephrotic syndrome and also has a pathogenic variant in <i>NPHS2</i> |                                 |
| RGC-0169 | M | 2   | Cystic kidney      | 1 | <i>PKD1</i>   | NM_001009944.2; c.7146C>G (p.S2382R)(Het)                    | 0          | 23.3  |                                                                                  |                                 |
| RGC-0169 | M | 2   | Cystic kidney      | 1 | <i>NPHP1</i>  | NM_000272.3; duplication of whole gene                       |            | NA    | Reported in autism but there was not concern about DD or ASD in this patient     |                                 |
| RGC-0170 | F | 5   | Proteinuria        | 1 | <i>CUBN</i>   | NM_001081.3; c.2677A>G (p.T893A)(Het)                        | 146/143296 | 4.896 | Phase of the two VUSs are unknown                                                | Parents did not provide samples |
| RGC-0170 | F | 5   | Proteinuria        | 1 | <i>CUBN</i>   | NM_001081.3;c.5285T>G, (p.V1762G)(Het)                       | 12/282422  | 5.578 | Phase of the two VUSs are unknown                                                | Follow up                       |
| RGC-0170 | F | 5   | Proteinuria        | 1 | <i>NPHS1</i>  | NM_004646.3; c.710T>C (p.L237P)(Het)                         | 4/251428   | 31    | Recessive disorder and only one heterozygous variant                             |                                 |
| RGC-0170 | F | 5   | Proteinuria        | 1 | <i>PAX2</i>   | M_003990.4; c.809G>A (p.R270H)(Het)                          | 7/251366   | 29.2  |                                                                                  | Ophthalmology evaluation        |
| RGC-0170 | F | 5   | Proteinuria        | 1 | <i>PLCE1</i>  | NM_016341.3; c.642A>T (p.G214G)(Het)                         | 293/280000 | 10.49 | Recessive disorder and only one                                                  |                                 |



|          |   |    |                           |   |                 |                                                                   |            |       |                                                      |                                     |
|----------|---|----|---------------------------|---|-----------------|-------------------------------------------------------------------|------------|-------|------------------------------------------------------|-------------------------------------|
|          |   |    |                           |   |                 |                                                                   |            |       | heterozygous variant                                 |                                     |
| RGC-0170 | F | 5  | Proteinuria               | 1 | <i>SMARCAL1</i> | M_014140.3; c.1196C>T (p.T399M)(Het)                              | 353/282896 | 0.899 | Recessive disorder and only one heterozygous variant |                                     |
| RGC-0170 | F | 5  | Proteinuria               | 1 | <i>WDR73</i>    | NM_032856.3; c.481G>T (p.V161F)(Het)                              | 5/248808   | 11.65 | Recessive disorder and only one heterozygous variant |                                     |
| RGC-0174 | M | 14 | Other (Alagille syndrome) | 1 | <i>JAG1</i>     | NM_000214.2; c.776G>T (p.G259V)(Het)(VUS)                         | 0          | 26.6  |                                                      | tES recommended                     |
| RGC-0180 | F | 5  | Proteinuria               | 1 | <i>INF2</i>     | NM_022489.3; c.2851C>T (p.R951W)(Het)                             | 1/154628   | 23.6  | Father had trace of protein in dipstick              | Testing of siblings for <i>INF2</i> |
| RGC-0184 | M | 4  | Proteinuria               | 3 | <i>EVC2</i>     | arr[GRCh37] 4p16.2(5616917_5699833)x3                             | NA         | NA    |                                                      | Parental testing recommended        |
| RGC-0187 | F | 4  | Cystic kidney             | 3 | <i>PUF60</i>    | NM_078480.2 ; c.1292C>T (p.P43L)(Het)(inherited from father)      | 0          | 22.5  | Father does not have kidney disease                  |                                     |
| RGC-0187 | F | 4  | Cystic kidney             | 3 | <i>GLIS2</i>    | NM_032575.2; c.1244C>T (p.P415L) (Het)(inherited from mother)     | 21/176552  | 26.8  | Recessive disorder and only one heterozygous variant |                                     |
| RGC-0187 | F | 4  | Cystic kidney             | 3 | <i>ARHGDI1A</i> | NM_001301242.1; c.544A>G (p.T182A)(Hom)(both parents are carrier) | 1/249280   | 6.032 | Seems disease causing                                | Testing of siblings recommended     |
| RGC-0187 | F | 4  | Cystic kidney             | 3 | <i>FLNA</i>     | NM_001456.3; c.1399C>T (p.R467C)(Het)(inherited from mother)      | 1/177746   | 23.6  | Mother unaffected                                    |                                     |

DI, Diabetes insipidus; Es, Exome sequencing; PKDB, Autosomal Dominant Polycystic Kidney Disease Mutation Database; RBP, Retinol-binding Protein; TBM, Thin basement membrane; UA, Urine analysis; US, Ultrasound. Type of the testing; 1, panel; 2, CMA; 3, proband ES; 4, trio ES; 5, Total Blueprint panel.
